# Supplementary material
Source: Copernicus journal article supplement (doi:10.5194/cp-22-957-2026)
Supplement: Supplementary file 1 [file cp-22-957-2026-supplement.pdf]

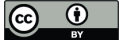

*Supplement of*

## **Newly recovered series of meteorological measurements in SW Greenland (Nuuk) in the period 1806–1813**

**Rajmund Przybylak et al.**

*Correspondence to:* Przemysław Wyszynski ([przemyslaw.wyszynski@umk.pl](mailto:przemyslaw.wyszynski@umk.pl)) and Garima Singh ([garima.singh@doktorant.umk.pl](mailto:garima.singh@doktorant.umk.pl))

The copyright of individual parts of the supplement might differ from the article licence.

## Supplementary material

**Table S1.** Mean monthly morning, midday and evening air temperature (°C) in Nuuk in the period Aug 1807–Jul 1813

| Period         | Aug        | Sep         | Oct         | Nov         | Dec         | Jan          | Feb          | Mar          | Apr          | May         | Jun         | Jul        | Annual mean |
|----------------|------------|-------------|-------------|-------------|-------------|--------------|--------------|--------------|--------------|-------------|-------------|------------|-------------|
| Morning        |            |             |             |             |             |              |              |              |              |             |             |            |             |
| 1807/08        | 2.9        | -3.0        | -1.8        | -4.3        | -7.0        | -19.3        | -13.7        | -10.9        | -7.0         | -1.5        | 0.6         | 1.1        | -5.3        |
| <b>1808/09</b> | <b>5.2</b> | <b>-1.8</b> | <b>-2.1</b> | <b>-4.8</b> | <b>-5.1</b> | <b>-3.6</b>  | <b>-8.2</b>  | <b>-5.0</b>  | <b>-2.7</b>  | <b>-2.6</b> | <b>-1.2</b> | <b>5.5</b> | <b>-2.2</b> |
| 1809/10        | 3.7        | 0.0         | -1.7        | -2.6        | -9.4        | -8.5         | -9.6         | -6.0         | -5.6         | 0.8         | 2.7         | 6.0        | -2.5        |
| <i>1810/11</i> | <i>1.8</i> | <i>-2.2</i> | <i>-2.7</i> | <i>-3.3</i> | <i>-8.4</i> | <i>-15.9</i> | <i>-19.2</i> | <i>-25.1</i> | <i>-10.0</i> | <i>-5.9</i> | <i>0.3</i>  | <i>3.3</i> | <i>-7.3</i> |
| 1811/12        | 3.8        | -0.8        | -2.7        | -9.2        | -10.6       | -12.0        | -25.1        | -13.9        | -5.4         | -1.6        | 1.1         | 6.4        | -5.8        |
| 1812/13        | 4.1        | -1.2        | -2.6        | -5.1        | -4.9        | -16.1        | -12.2        | -24.1        | -11.0        | -5.6        | 5.2         | 7.1        | -5.5        |
| <b>1807-13</b> | <b>3.6</b> | <b>-1.5</b> | <b>-2.3</b> | <b>-4.9</b> | <b>-7.6</b> | <b>-12.6</b> | <b>-14.7</b> | <b>-14.2</b> | <b>-6.9</b>  | <b>-2.7</b> | <b>1.4</b>  | <b>4.9</b> | <b>-4.8</b> |
| Midday         |            |             |             |             |             |              |              |              |              |             |             |            |             |
| 1807/08        | 4.1        | -1.4        | -1.4        | -3.0        | -6.2        | -19.3        | -12.8        | -8.8         | -2.8         | -0.2        | 1.9         | 3.0        | -3.9        |
| 1808/09        | 6.8        | 0.3         | -1.2        | -4.0        | -4.1        | -2.5         | -6.5         | -2.4         | 0.1          | 0.3         | 1.1         | 7.7        | -0.4        |
| <b>1809/10</b> | <b>5.5</b> | <b>3.8</b>  | <b>0.6</b>  | <b>-1.5</b> | <b>-8.6</b> | <b>-8.0</b>  | <b>-7.6</b>  | <b>-2.3</b>  | <b>-0.4</b>  | <b>7.6</b>  | <b>7.4</b>  | <b>9.9</b> | <b>0.5</b>  |
| <i>1810/11</i> | <i>5.8</i> | <i>2.9</i>  | <i>-0.3</i> | <i>-2.4</i> | <i>-7.6</i> | <i>-15.0</i> | <i>-16.9</i> | <i>-20.9</i> | <i>-5.8</i>  | <i>-2.6</i> | <i>4.5</i>  | <i>6.0</i> | <i>-4.3</i> |
| 1811/12        | 7.5        | 2.6         | -0.7        | -8.1        | -9.4        | -10.6        | -23.6        | -10.6        | -0.3         | 4.3         | 6.1         | 10.7       | -2.7        |
| 1812/13        | 8.0        | 2.4         | 0.0         | -2.4        | -4.5        | -15.1        | -10.4        | -18.7        | -4.6         | 2.4         | 8.8         | 10.3       | -2.0        |
| <b>1807-13</b> | <b>6.3</b> | <b>1.8</b>  | <b>-0.5</b> | <b>-3.6</b> | <b>-6.7</b> | <b>-11.7</b> | <b>-13.0</b> | <b>-10.6</b> | <b>-2.3</b>  | <b>2.0</b>  | <b>5.0</b>  | <b>7.9</b> | <b>-2.1</b> |
| Evening        |            |             |             |             |             |              |              |              |              |             |             |            |             |
| 1807/08        | 2.7        | -3.4        | -2.7        | -4.3        | -6.5        | -19.4        | -12.4        | -11.5        | -7.6         | -3.5        | -0.1        | 1.0        | -5.6        |
| <b>1808/09</b> | <b>4.6</b> | <b>-1.8</b> | <b>-2.4</b> | <b>-5.0</b> | <b>-4.6</b> | <b>-3.7</b>  | <b>-7.7</b>  | <b>-4.5</b>  | <b>-2.6</b>  | <b>-2.9</b> | <b>-1.1</b> | <b>4.4</b> | <b>-2.3</b> |
| 1809/10        | 3.6        | 0.5         | -1.9        | -3.0        | -9.5        | -8.3         | -9.8         | -7.0         | -5.7         | -0.6        | 2.5         | 5.1        | -2.8        |
| <i>1810/11</i> | <i>1.7</i> | <i>-2.1</i> | <i>-3.2</i> | <i>-3.5</i> | <i>-8.5</i> | <i>-15.2</i> | <i>-20.3</i> | <i>-27.1</i> | <i>-12.8</i> | <i>-7.0</i> | <i>-0.8</i> | <i>2.7</i> | <i>-8.0</i> |
| 1811/12        | 4.1        | -1.3        | -2.8        | -9.4        | -10.7       | -12.1        | -26.2        | -14.8        | -6.3         | -3.4        | 2.3         | 6.2        | -6.2        |
| 1812/13        | 3.2        | -1.2        | -2.8        | -4.1        | -4.8        | -16.0        | -12.6        | -25.2        | -11.4        | -6.5        | 4.4         | 6.1        | -5.9        |
| <b>1807-13</b> | <b>3.3</b> | <b>-1.6</b> | <b>-2.6</b> | <b>-4.9</b> | <b>-7.5</b> | <b>-12.5</b> | <b>-14.9</b> | <b>-15.0</b> | <b>-7.7</b>  | <b>-4.0</b> | <b>1.2</b>  | <b>4.2</b> | <b>-5.2</b> |

Key: bold italic font – average 6-year values, bold font – the warmest year, italic font – the coldest year

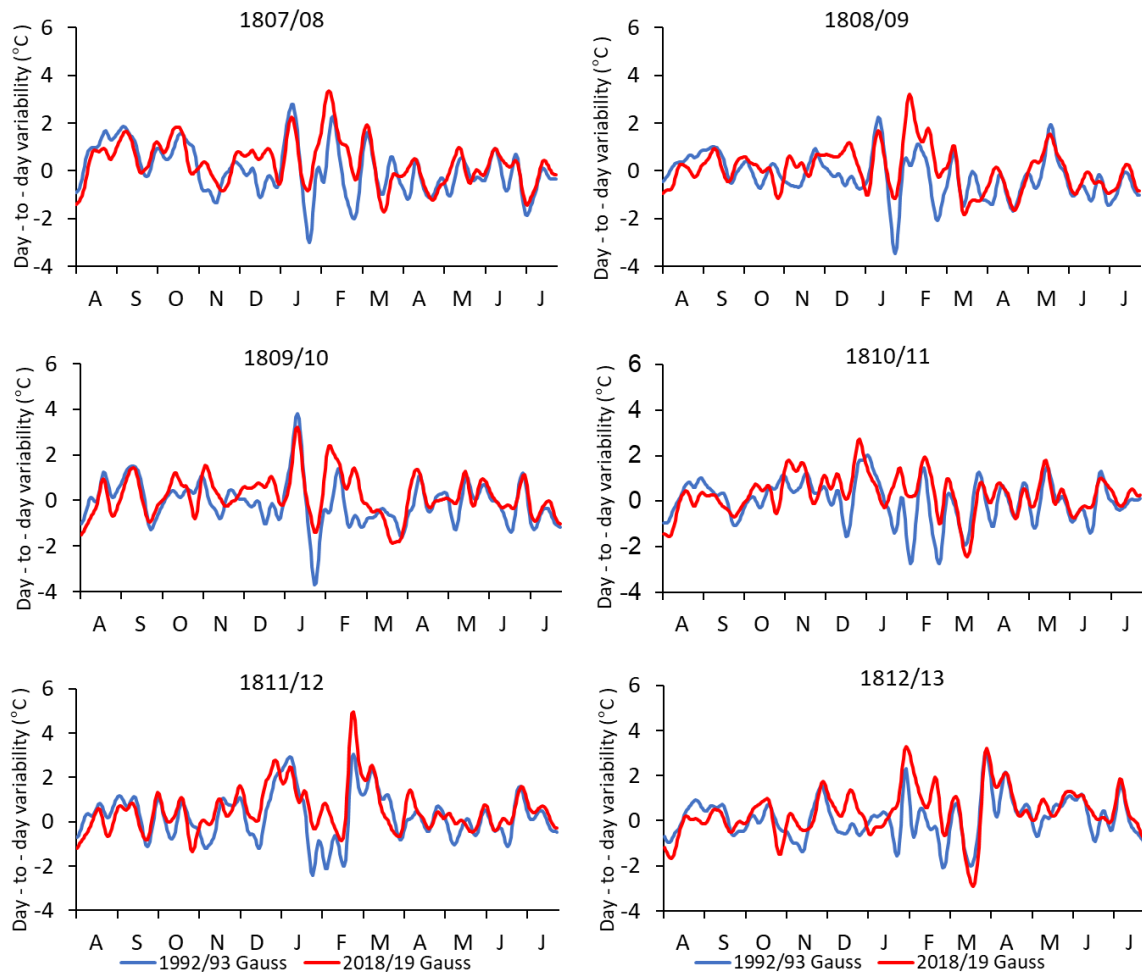

Fig. S1. Smoothed series of differences in DDTV between historical and contemporary periods for Nuuk (for the present, the two years selected were 1992/93 [cold] and 2018/19 [warm]). Individual days were filtered by a Gaussian low-pass filter with a standard deviation of three days in its distribution, corresponding to a rectangular filter of about 10 days.

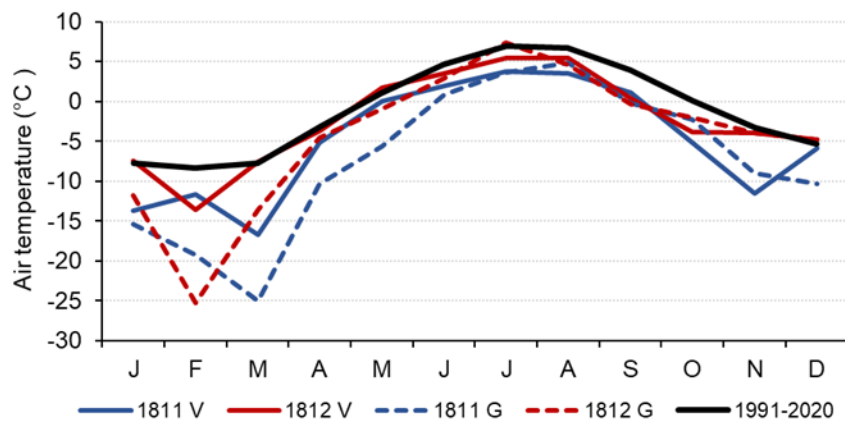

**Fig. S2.** Yearly courses of air temperature in Nuuk in the years 1811 and 1812. Explanation: V – data after Vinther et al. (2006), G – data from this study; note that data come from different localities in Nuuk.
